# Supplementary material for: Added Value of a Blinded Outcome Adjudication Committee in an Open-Label Randomized Stroke Trial
Source: PubMed Central journal article supplement (PMC8700318; doi:10.1161/strokeaha.121.035301), 2021-10-05
Supplement: str-53-061-s001.pdf [file str-53-061-s001.pdf]

## **SUPPLEMENTAL MATERIAL ON:**

### **The added value of a blinded outcome adjudication committee in an open-label randomized stroke trial**

*Nadinda A.M. van der Ende, MD;<sup>1,2</sup> Bob Roozenbeek, MD, PhD;<sup>1,2</sup> Olvert A. Berkhemer, MD, PhD;<sup>1-4</sup> Peter J. Koudstaal, MD, PhD;<sup>1</sup> Jelis Boiten, MD, PhD;<sup>5</sup> Ewoud J. van Dijk, MD, PhD;<sup>6</sup> Yvo B.W.E.M. Roos, MD, PhD;<sup>4</sup> Robert J. van Oostenbrugge, MD, PhD;<sup>7</sup> Charles B.L.M. Majoie, MD, PhD;<sup>3</sup> Wim van Zwam, MD, PhD;<sup>8</sup> Hester F. Lingsma, PhD;<sup>9</sup> Aad van der Lugt, MD, PhD;<sup>2</sup> Diederik W.J. Dippel, MD, PhD;<sup>1</sup> on behalf of the MR CLEAN Investigators<sup>10</sup>*

Departments of Neurology<sup>1</sup>, Radiology and Nuclear Medicine<sup>2</sup>, Public Health<sup>9</sup>, Erasmus MC University Medical Center, Rotterdam, the Netherlands;

Departments of Radiology and Nuclear Medicine<sup>3</sup>, and Neurology<sup>4</sup>, Amsterdam UMC, University of Amsterdam, Amsterdam, the Netherlands;

Department of Neurology<sup>5</sup>, Haaglanden Medical Center, The Hague, The Netherlands;

Department of Neurology<sup>6</sup>, Radboud University Medical Center, Nijmegen, The Netherlands;

Departments of Neurology<sup>7</sup>, and Radiology and Nuclear Medicine<sup>8</sup>, Cardiovascular Research Institute Maastricht, Maastricht University Medical Center, Maastricht, the Netherlands;

The MR CLEAN Investigators<sup>10</sup> are listed in the Appendix.

**Supplemental Table I.** Guidelines for Reporting Reliability and Agreement Studies (GRRAS).

| <b>Section</b>     | <b>Item number</b> | <b>Description</b>                                                                                                                          | <b>Addressed on page number</b> |
|--------------------|--------------------|---------------------------------------------------------------------------------------------------------------------------------------------|---------------------------------|
| Title and Abstract | 1                  | Identify in title or abstract that interrater/intrarater reliability or agreement was investigated.                                         | 3                               |
| Introduction       | 2                  | Name and describe the diagnostic or measurement device of interest explicitly.                                                              | 5-6                             |
|                    | 3                  | Specify the subject population of interest.                                                                                                 | 5-6                             |
|                    | 4                  | Specify the rater population of interest (if applicable).                                                                                   | 5-6                             |
|                    | 5                  | Describe what is already known about reliability and agreement and provide a rationale for the study (if applicable).                       | 5-6                             |
| Methods            | 6                  | Explain how the sample size was chosen. State the determined number of raters, subjects/objects, and replicate observations.                | 6-7                             |
|                    | 7                  | Describe the sampling method.                                                                                                               | 6-7                             |
|                    | 8                  | Describe the measurement/rating process (e.g. time interval between repeated measurements, availability of clinical information, blinding). | 6-7                             |
|                    | 9                  | State whether measurements/ratings were conducted independently.                                                                            | 7                               |
|                    | 10                 | Describe the statistical analysis.                                                                                                          | 8                               |

|                    |    |                                                                                                                                           |                |
|--------------------|----|-------------------------------------------------------------------------------------------------------------------------------------------|----------------|
| Results            | 11 | State the actual number of raters and subjects/objects which were included and the number of replicate observations which were conducted. | 8-9 + Figure 1 |
|                    | 12 | Describe the sample characteristics of raters and subjects (e.g. training, experience).                                                   | 8 + Table 1    |
|                    | 13 | Report estimates of reliability and agreement including measures of statistical uncertainty.                                              | 9 + Table 2-3  |
| Discussion         | 14 | Discuss the practical relevance of results.                                                                                               | 10-13          |
| Auxiliary material | 15 | Provide detailed results if possible (e.g. online)                                                                                        | NA             |

NA indicates not applicable.

## Supplemental Table II. Three month follow-up Case Report Form

Date of three month follow-up: \_\_\_ - \_\_\_ - \_\_\_ (dd-mm-yyyy) Who completed assessment: \_\_\_\_\_

Patient deceased:  Yes  No

Date of death: \_\_\_\_\_

Days in a nursing home after discharge: \_\_\_\_\_ days Length: \_\_\_\_\_

Days in a rehabilitation center after discharge: \_\_\_\_\_ days

Days in a geriatric rehabilitation unit after discharge: \_\_\_\_\_ days Smoking on admission? \_\_\_\_\_

Have you been re-admitted to a hospital after discharge? \_\_\_\_\_ days

Current residence:

Home  Nursing home  Other: \_\_\_\_\_

Rehabilitation center  Hospital

Geriatric rehabilitation unit  Friends/family

Days in a day care facility after discharge \_\_\_\_\_ days

Hours of speech and language therapy after discharge: \_\_\_\_\_ hours

Hours of physiotherapy after discharge: \_\_\_\_\_ hours

Hours of ergo therapy after discharge? \_\_\_\_\_ hours

Do you feel that you have made a complete recovery from your stroke?  Yes  No

Does the person have difficulty reading or writing?  Yes  No

Does the person have difficulty speaking or finding the right word?  Yes  No

Does the person have problems with balance or coordination?  Yes  No

Does the person have visual problems?  Yes  No

Does the person have numbness (face, arms, legs, hands, feet)?  Yes  No

Has the person experienced loss of movement (face, arms, legs, hands, feet)?  Yes  No

Does the person have difficulty with swallowing?  Yes  No

Any other problems or difficulties?  Yes  No

Is assistance needed for activities of daily living?  Yes  No

Is assistance essential for preparing a simple meal?  
*(For example, able to prepare breakfast or a snack)*  Yes  No

Is assistance essential for basic household chores?  
*(For example, finding and putting away clothes, clearing up after a meal. Excludes chores that do not need to be done every day, such as using a vacuum cleaner.)*  Yes  No

Is assistance essential for managing finances?  Ja  Nee

Is assistance essential for local transportation?  
*(Patients may drive or use public transport to get around. Ability to use a taxi is sufficient, provided the person can phone for it themselves and instruct the driver.)*  Yes  No

Is assistance essential for local shopping?  
*(Local shopping: at least able to buy a single item.)*  Yes  No

Before stroke was the person looking after family at home?  Yes  No

**If yes:** Since stroke has there been a change in their ability to look after family at home?  Yes  No

Before stroke, was the person working or seeking work (or studying as a student)?  Yes  No  
*(If the person was not employed or seeking work before stroke, or the person was retired then indicate 'No')*

**If yes:** Since stroke has there been a change in the person's ability to work or study?  
*(Change in ability to work or study includes loss of employment or reduction in level of responsibility; change in education or problems with study).*  Yes  No

Before stroke did the person have regular free-time activities?  Yes  No

**If yes:** Since stroke has there been a change in their ability to participate in these activities?  Yes  No

Do you live alone?  Yes  No

Is there someone who visits you regularly and also helps you with something?  Yes  No

Do you have professional help? *(housekeeping or home care)*  Yes  No

Are there other illnesses or shortcomings that make you less able to take care of yourself or make you less mobile?  Yes  No

Can you easily be home alone for a day?  Yes  No

Can you easily be home alone for a week?  Yes  No

---

---

---

---

---

---

---

---

---

---

## BARTHEL INDEX

### Feeding

- Unable
- Needs help cutting, spreading butter, or requires modified diet
- Independent

### Transfer (bed to chair and back)

- Unable, no sitting balance
- Major help (one or two people, physical), can sit
- Minor help (verbal or physical)
- Independent

### Grooming

- Needs help with personal care
- Independent face/hair/teeth/shaving (implements provided)

### Toilet use

- Dependent
- Needs some help, but can do something alone
- Independent (on and off, dressing, wiping)

### Bathing

- Dependent
- Independent (or in shower)

### Mobility (on level surfaces)

- Immobile or < 50 yards
- Wheelchair independent, including corners, > 50 yards
- Walks with help of one person (verbal or physical) > 50 yards
- Independent (but may use aid, e.g., cane) > 50 yards

### Stairs

- Unable
- Needs help (verbal, physical, carrying aid)
- Independent

### Dressing

- Dependent
- Needs help but can do about half unaided
- Independent (including buttons, zips, laces, etc)

### Bowels

- Incontinent (or needs to be given enemas)
- Occasional accident
- Continent

### Bladder

- Incontinent, or catheterised and unable to manage alone
- Occasional accident
- Independent

## EQ5D

### Mobility

- I have no problems in walking
- I have some problems in walking
- I am confined to bed

### Self-Care

- I have no problems with self-care
- I have some problems with washing or dressing myself
- I am unable to wash or dress myself

### Usual activities (e.g. work, study, housework, family or leisure activities)

- I have no problems with performing my usual activities
- I have some problems with performing my usual activities
- I am unable to perform my usual activities

### Pain / Discomfort

- I have no pain or discomfort
- I have some moderate pain or discomfort
- I have extreme pain or discomfort

### Anxiety / Depression

- I am not anxious or depressed
- I am moderately anxious or depressed
- I am extremely anxious or depressed

### Assessment by:

- Patient
- Proxy
